# Supplementary material for: Poor Prognostic Biomarker KIAA1522 Is Associated with Immune Infiltrates in Hepatocellular Carcinoma
Source: Hindawi journal article supplement (doi:10.1155/2023/3538928), 2023-01-31
Supplement: f1 [file 3538928.f1.pdf]

**Table S1. Signaling pathways are significantly associated with KIAA1522 expression.**

| Description                                                           | SetSize | NES          | p.adjust    | rank  | leading_edge                   |
|-----------------------------------------------------------------------|---------|--------------|-------------|-------|--------------------------------|
| GO_IMMUNOGLOBULIN_COMPLEX_CIRCULATING                                 | 86      | 1.631448633  | 0.035018887 | 3447  | tags=28%, list=10%, signal=25% |
| GO_IMMUNOGLOBULIN_COMPLEX                                             | 86      | 1.631451507  | 0.035018887 | 13593 | tags=66%, list=38%, signal=41% |
| GO_IMMUNOGLOBULIN_RECEPTOR_BINDING                                    | 58      | 1.630511383  | 0.035149891 | 5358  | tags=26%, list=15%, signal=22% |
| GO_HUMORAL_IMMUNE_RESPONSE_MEDIATED<br>_BY_CIRCULATING_IMMUNOGLOBULIN | 15      | 1.634529021  | 0.03481432  | 2368  | tags=33%, list=7%, signal=31%  |
| GO_ANTIGEN_BINDING                                                    | 276     | 2.125666346  | 0.020126438 | 8480  | tags=41%, list=24%, signal=31% |
| GO_MONOOXYGENASE_ACTIVITY                                             | 19      | 1.537748219  | 0.055497402 | 7047  | tags=47%, list=20%, signal=38% |
| GO_EYE_PHOTORECEPTOR_CELL_DIFFERENTIATION                             | 38      | 1.706983826  | 0.026827951 | 1683  | tags=66%, list=5%, signal=63%  |
| GO_EXTRACELLULAR_TRANSPORT                                            | 39      | 1.708317735  | 0.026827951 | 2562  | tags=56%, list=7%, signal=52%  |
| GO_HIGH_DENSITY_LIPOPROTEIN_PARTICLE                                  | 13      | 1.646896642  | 0.032895702 | 3483  | tags=38%, list=10%, signal=35% |
| KEGG_DNA_REPLICATION                                                  | 36      | 2.023524517  | 0.012754269 | 7556  | tags=64%, list=21%, signal=50% |
| KEGG_LEISHMANIA_INFECTIO                                              | 70      | 2.04761528   | 0.012754269 | 6176  | tags=49%, list=17%, signal=40% |
| KEGG_NEUROACTIVE_LIGAND_RECEPTOR<br>_INTERACTION                      | 270     | 2.141688246  | 0.012754269 | 4629  | tags=34%, list=13%, signal=30% |
| KEGG_AXON_GUIDANCE                                                    | 129     | 2.146674673  | 0.012754269 | 5704  | tags=29%, list=16%, signal=25% |
| KEGG_CELL_CYCLE                                                       | 124     | 2.245176909  | 0.012754269 | 7999  | tags=50%, list=22%, signal=39% |
| KEGG_FATTY_ACID_METABOLISM                                            | 42      | -2.743236611 | 0.020809665 | 3078  | tags=60%, list=9%, signal=54%  |
| KEGG_DRUG_METABOLISM_CYTOCHROME_P450                                  | 71      | -2.574891141 | 0.023174647 | 1462  | tags=46%, list=4%, signal=45%  |
| KEGG_RETINOL_METABOLISM                                               | 64      | -2.458856538 | 0.023089127 | 1696  | tags=45%, list=5%, signal=43%  |
| KEGG_PPAR_SIGNALING_PATHWAY                                           | 69      | -2.392889474 | 0.023089127 | 2577  | tags=42%, list=7%, signal=39%  |
